# Supplementary material for: Integrated Bioinformatic Analyses and Immune Characterization of New Neisseria gonorrhoeae Vaccine Antigens Expressed during Natural Mucosal Infection
Source: PubMed Central journal article supplement (PMC6963464; doi:10.3390/vaccines7040153), 2019-10-17
Supplement: vaccines-07-00153-s001.pdf [file vaccines-07-00153-s001.pdf]

## Supplementary Materials:

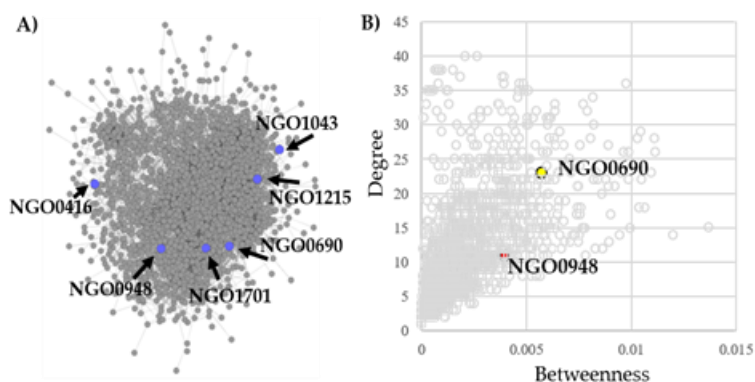

**Figure S1.** Network analysis. (A) The six candidates positioned within the gonococcal gene expression network. (B) Centrality of the candidates within the gonococcal gene network measured in degree (y-axis) and betweenness (x-axis) values. NGO0690 (yellow dot) has both high degree and betweenness and NGO0948 (red dot) has high degree. The other four candidates have average values (not shown).

**Table S1.** Candidates alleles analysis in *N. lactamica* (288 strains in PubMLST).

| Gene                         | Total Alleles | <sup>1</sup> Frequency |              | <sup>2</sup> Distribution (% of 288 strains) | <i>p</i> -Dist. |
|------------------------------|---------------|------------------------|--------------|----------------------------------------------|-----------------|
|                              |               | Allele                 | # of Strains |                                              |                 |
| <i>ngo0416</i><br>(NEIS0782) | -             | -                      | 288          | 0                                            | 0.006           |
| <i>ngo0690</i><br>(NEIS1164) | 13            | 3<br>8                 | 229<br>23    | 79.5<br>7.9                                  | 0.01            |
| <i>ngo0948</i><br>(NEIS0906) | 17            | 3<br>70                | 225<br>21    | 78.1<br>7.2                                  | 0.005           |
| <i>ngo1043</i><br>(NEIS2446) | 8             | 28<br>17               | 242<br>21    | 84<br>7.3                                    | 0.01            |
| <i>ngo1215</i><br>(NEIS1474) | 10            | 34<br>7                | 241<br>23    | 74.3<br>7.9                                  | 0.012           |
| <i>ngo1701</i><br>(NEIS2720) | 10            | 20<br>24               | 225<br>23    | 78.1<br>7.9                                  | 0.005           |

<sup>1</sup> Most frequent alleles in the highest number of strains. <sup>2</sup> Percent of strains expressing the high frequency alleles<sup>1</sup> within the total number of isolates. Data collected from PubMLST [61].
